# Supplementary material
Source: Springer Nature journal article supplement (https://www.springermedizin.de/resource/supplementary/12955_2011_905_MOESM1_ESM.pdf/9558684)

DCGM-37

Main  
domains

DISABKIDS subscales

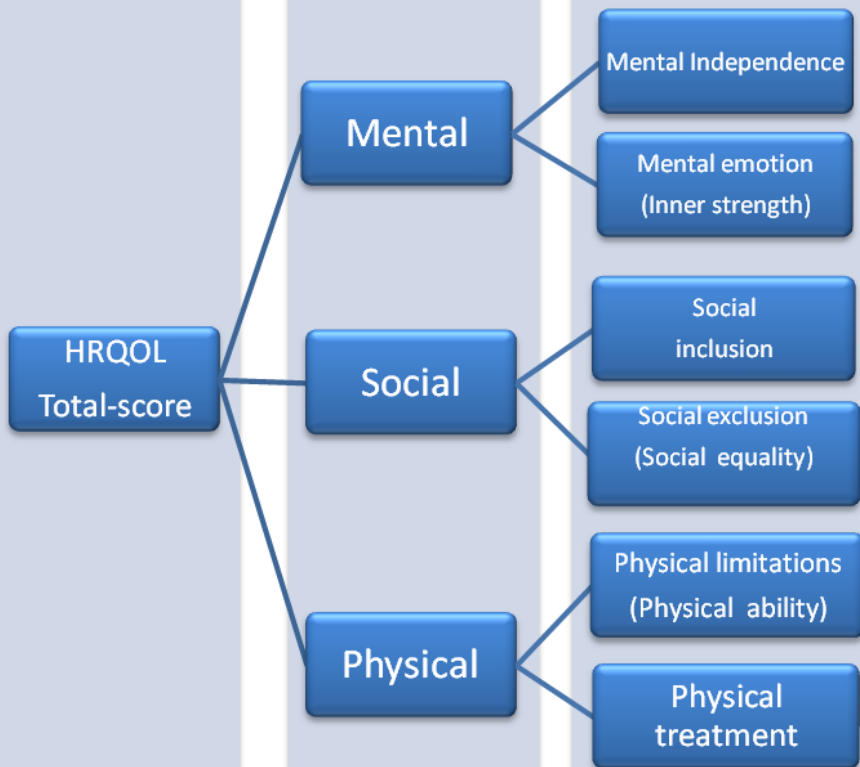

Supplement: MOESM1 [file 9558684]
